# Supplementary material
Source: PubMed Central journal article supplement (PMC9360394)
Supplement: 13244_2022_1266_MOESM1_ESM.pdf [file 13244_2022_1266_MOESM1_ESM.pdf]

## ELECTRONIC SUPPLEMENTARY MATERIAL

### Imaging features of COVID-19 associated secondary sclerosing cholangitis on magnetic resonance cholangiopancreatography – a retrospective analysis

| Supplementary Table 1. Sequence parameters of analyzed MRI studies                                                                    |           |           |                      |                |                  |                |                 |                 |                     |                   |                  |                     |
|---------------------------------------------------------------------------------------------------------------------------------------|-----------|-----------|----------------------|----------------|------------------|----------------|-----------------|-----------------|---------------------|-------------------|------------------|---------------------|
| Sequence                                                                                                                              | TR (ms)   | TE (ms)   | Slice thickness (mm) | Slice gap (mm) | Image slices (n) | Flip angle (°) | Matrix size     | FOV (mm)        | Signal averages (n) | Echo train length | Image plane      | b-values (low/high) |
| 3D MRCP                                                                                                                               | 1024-6015 | 600-997   | 1-2.2                | 0-1.1          | 64-124           | 80-140         | 320x320-768x768 | 260x260-380x380 | 1-2                 | 100-290           | coronal          |                     |
| T2-weighted image                                                                                                                     | 406-3276  | 80-110    | 4-7                  | 5.5-8          | 30-47            | 90-180         | 256x256-560x560 | 310x380-420x420 | 0.65-1              | 1-134             | axial or coronal |                     |
| Fat-suppressed T2-weighted image                                                                                                      | 2177-9230 | 78-113    | 5                    | 5-6.5          | 27-46            | 90-160         | 256x256-512x512 | 380x380-420x420 | 1-2                 | 21-50             | axial            |                     |
| T1-weighted image                                                                                                                     | 2.77-6.79 | 1.26-4.75 | 3-5                  | 1.5-2.5        | 72-140           | 9-20           | 280-320-512x512 | 310x380-450x450 | 0.7-1               | 1-78              | axial            |                     |
| Diffusion-weighted image                                                                                                              | 1687-6900 | 52-81     | 5-6                  | 5.5-7.2        | 36-78            | 90             | 240x240-336x336 | 285x380-450x450 | 1-8                 | 1-67              | axial            | 0-50/800            |
| Abbreviations:<br>MRCP = Magnetic resonance cholangiopancreatography<br>TR = Repetition time<br>TE = Echo time<br>FOV = Field of view |           |           |                      |                |                  |                |                 |                 |                     |                   |                  |                     |
